# Supplementary material for: Supplementing Low-Sodium Bicarbonate–Calcic (Lete)® Water: Effects in Women on Bone and Systemic Metabolism
Source: MDPI journal article supplement (doi:10.3390/metabo13111109), 2023-10-24
Supplement: s1 [file s1]

# Supplementing low-sodium bicarbonate-calcic (Lete)<sup>®</sup> water: effects in women on bone and systemic metabolism.

Carmen Marino<sup>†1,2</sup>, Imma Pagano<sup>†1,3</sup>, Giuseppe Castaldo<sup>2</sup>, Manuela Grimaldi<sup>1</sup>, Maria D'Elia<sup>1,5</sup>, Angelo Santoro<sup>1,4</sup>, Aurelio Conte<sup>2</sup>, Paola Molettieri<sup>2</sup>, Chiara Parisella<sup>2</sup>, Michela Buonocore<sup>6</sup>, Anna Maria D'Ursi<sup>1,5\*</sup>, Luca Rastrelli<sup>1,5\*</sup>

† authors contributed equally to the work

1.Department of Pharmacy, University of Salerno, Via Giovanni Paolo II 132, 84084 Fisciano (SA), Italy.  
[cmarino@unisa.it](mailto:cmarino@unisa.it), [asantoro@unisa.it](mailto:asantoro@unisa.it), [magrimadi@unisa.it](mailto:magrimadi@unisa.it), [mdelia@unisa.it](mailto:mdelia@unisa.it), [rastrelli@unisa.it](mailto:rastrelli@unisa.it), [dursi@unisa.it](mailto:dursi@unisa.it)

2.Department of Pharmacy and Ph.D. Program in Drug Discovery and Development, University of Salerno, via Giovanni Paolo II, 132, 84084 Fisciano, Salerno, Italy.

3.NutriKeto\_LAB Unisa - "San Giuseppe Moscati" National Hospital (AORN), Contrada Amoretta, 83100 Avellino (AV), Italy. [giuseppecastaldo@yahoo.it](mailto:giuseppecastaldo@yahoo.it), [paolamolettieri@gmail.com](mailto:paolamolettieri@gmail.com)

4.Department of Pharmacy, Scuola di Specializzazione in Farmacia Ospedaliera, University of Salerno, via Giovanni Paolo II, 132, 84084, Italy.

5.NBFC, National Biodiversity Future Center, Palermo 90133, Italy. [rastrelli@unisa.it](mailto:rastrelli@unisa.it), [dursi@unisa.it](mailto:dursi@unisa.it)

6.Department of Chemical Sciences, University of Naples Federico II, Complesso Universitario di Monte Sant'Angelo, Via Cinthia 21, 80126 Naples, Italy

\* Correspondence:

Correspondence: Anna Maria D'Ursi and Luca Rastrelli, PhD, Department of Pharmacy, University of Salerno, Via Giovanni Paolo II, 132, 84084 Fisciano (SA), email: [dursi@unisa.it](mailto:dursi@unisa.it); [rastrelli@unisa.it](mailto:rastrelli@unisa.it); Tel.: 089969748

**Supplementary Table S1.** Eating habits at t0. Number of patients taking at least once a week a portion of the tabulated food.

**Supplementary Table S2** Intervention group and control group's clinical average  $\pm$  standard deviation parameters at t0. *P-value* was calculated using *T-test*.

**Supplementary Table S3** Intervention group's clinical average  $\pm$  standard deviation parameters at t0 and t6. *P-value* was calculated using *T-test*.

**Supplementary Table S4** Control group's clinical average  $\pm$  standard deviation parameters at t0 and t6. *P-value* was calculated using *T-test*.

**Supplementary Table S5.** Intervention group and control group's clinical average  $\pm$  standard deviation parameters at t6. *P-value* was calculated using *T-test*.

**Supplementary Table S6.** Important serum and urine metabolites identified by Fold Change and logarithmic Fold Change ( $\log_2(\text{FC})$ ) parameters calculated.

**Supplementary Table S7.** Important serum and urinary metabolites identified by t-tests values, p-values (Threshold  $<0.05$ ), logarithmic p-values and False Discovery Rate (FDR) parameters calculated for the most statistically significant compounds.

**Supplementary Figure S1.** Sample prediction area plot carried out using Centroid (a) Maximum distance (b) and Mahalanobis (c) showing the distribution of serum polar extract of intervention group at T0 (1) vs intervention group at T6 (2) in validation area.

**Supplementary Figure S2.** Sample prediction area plot carried out using Centroid (a) Maximum distance (b) and Mahalanobis (c) showing the distribution of urine polar extract intervention group at T0 (1) vs intervention group at T6 (2) in validation area.

**Supplementary Figure S3.** Sample prediction area plot carried out using Centroid (a) Maximum distance (b) and Mahalanobis (c) showing the distribution of serum polar extract intervention group at T6 vs CTRL group at T6 in validation area.

**Supplementary Figure S4.** Sample prediction area plot carried out using Centroid (a) Maximum distance (b) and Mahalanobis (c) showing the distribution of urine polar extract intervention group at T6 vs CTRL group at T6 in validation area.

**Supplementary Figure S5.** PCA score plot for  $^1\text{H}$  NMR data collected in 1D-NOESY spectra acquired at 600 MHz. Data represent the sera (a) and urine (b) from 79 women before (blue) and after (orange) bicarbonate-calcic water intake.

**Supplementary Table S1.** Eating habits at t0. Number of patients taking at least once a week a portion of the tabulated food.

| <b>Food</b>      | <b>YES</b> | <b>NO</b> |
|------------------|------------|-----------|
| Wholemeal bread  | 121/121    | 0/121     |
| Milk             | 119/121    | 2/121     |
| Yoghurts         | 117/121    | 4/121     |
| Cheese           | 121/121    | 0/121     |
| Fish             | 100/121    | 21/121    |
| Legume           | 110/121    | 11/121    |
| Fruits           | 121/121    | 0/121     |
| Vegetables       | 121/121    | 0/121     |
| Sweets           | 80/121     | 41/121    |
| Alcoholic drinks | 61/121     | 60/121    |
| Cereals          | 121/121    | 0/121     |
| Pasta            | 121/121    | 0/121     |
| Pizza            | 121/121    | 0/121     |
| Meats            | 121/121    | 0/121     |

**Supplementary Table S2** Intervention group and control group's clinical average  $\pm$  standard deviation parameters at t0. *P-value* was calculated using *T-test*.

| Parameters        | Intervention-group-t0 | CTRL-t0             | p.value |
|-------------------|-----------------------|---------------------|---------|
| ALB               | 4,12 $\pm$ 1,13       | 4,23 $\pm$ 1,01     | 0,65    |
| ALP               | 66,55 $\pm$ 20,78     | 60,54 $\pm$ 16,22   | 0,16    |
| Ca                | 9,37 $\pm$ 0,38       | 9,41 $\pm$ 0,38     | 0,67    |
| U Ca              | 184,31 $\pm$ 152,78   | 140,24 $\pm$ 96,44  | 0,14    |
| Ca <sup>++</sup>  | 4,49 $\pm$ 1,00       | 4,58 $\pm$ 0,76     | 0,67    |
| CL CR             | 103,79 $\pm$ 56,39    | 91,86 $\pm$ 33,58   | 0,27    |
| COL               | 188,00 $\pm$ 22,07    | 225,00 $\pm$ 45,48  | 0,26    |
| CREA              | 0,74 $\pm$ 0,15       | 0,73 $\pm$ 0,14     | 0,82    |
| CREA U            | 1.078,45 $\pm$ 539,81 | 925,11 $\pm$ 306,83 | 0,13    |
| GLIC              | 92,70 $\pm$ 13,29     | 90,53 $\pm$ 9,40    | 0,75    |
| HCO <sup>3-</sup> | 29,89 $\pm$ 2,55      | 30,40 $\pm$ 2,80    | 0,40    |
| HDL               | 56,00 $\pm$ 13,11     | 63,00 $\pm$ 14,17   | 0,53    |
| INSUL             | 6,54 $\pm$ 2,75       | 6,63 $\pm$ 4,12     | 0,96    |
| LDL               | 119,00 $\pm$ 9,54     | 145,50 $\pm$ 47,37  | 0,39    |
| Mg                | 1,99 $\pm$ 0,13       | 2,02 $\pm$ 0,14     | 0,30    |
| U Mg              | 78,67 $\pm$ 49,03     | 68,11 $\pm$ 30,43   | 0,26    |
| Na                | 140,62 $\pm$ 1,85     | 139,97 $\pm$ 2,05   | 0,14    |
| U Na              | 117,31 $\pm$ 64,34    | 110,97 $\pm$ 41,61  | 0,61    |
| OSTEO             | 18,06 $\pm$ 4,41      | 17,73 $\pm$ 6,34    | 0,79    |
| P                 | 3,50 $\pm$ 0,46       | 3,61 $\pm$ 0,27     | 0,18    |
| U P               | 667,33 $\pm$ 417,94   | 525,38 $\pm$ 259,89 | 0,08    |
| SPEC. W           | 1.017,14 $\pm$ 6,92   | 1.015,89 $\pm$ 5,60 | 0,38    |
| pH                | 5,76 $\pm$ 0,74       | 5,84 $\pm$ 0,67     | 0,61    |
| PTH               | 69,29 $\pm$ 17,97     | 60,76 $\pm$ 21,18   | 0,06    |
| VIT D             | 29,48 $\pm$ 12,84     | 27,84 $\pm$ 12,04   | 0,56    |

GLIC: glycemia (mg/ dL); CREA: creatinine (mg/dL); Na: sodium (mmol/L); Ca:calcium (mg/Dl); ALP: alkaline phosphatase (U/L); COL: cholesterol (mg/dL); HDL: Hight density lipoprotein (mg/ dL); LDL: Low density lipoprotein (mg/dL); P:phosphorus (mg/dL); Mg: magnesium (mg/dL); CREA U: urine creatinine (mg/24h); U Na: urinary sodium (mmol/24h); U Ca: urinary calcium (mmol/24h); U P: urinary phosphorus (mmol/24h); U Mg: urinary magnesium (mmol/24h); CL CR: creatinine clearance (ml/min); ALB: albumine (gr/dl); PTH: Parathormone (pg/ml); OSTEO: osteocalcine (mg/mL); 25-OHD: vitamine D (ng/ mL); INSUL: insulinemia (mcUI/ml); Ph; P.SPEC: specific weight; HCO<sup>3-</sup>: bicarbonate (mmol/L); Ca<sup>++</sup>: ionized calcium (mg/ dL).

**Supplementary Table S3** Intervention group's clinical average  $\pm$  standard deviation parameters at t0 and t6. *P-value* was calculated using *T-test*.

| Parameters        | Intervention-group-t0 | Intervention_group_t6 | p.value |
|-------------------|-----------------------|-----------------------|---------|
| ALB               | 4,12 $\pm$ 1,13       | 4,4 $\pm$ 0,1         | 1,00    |
| ALP               | 66,55 $\pm$ 20,78     | 66,9 $\pm$ 19,16      | 0,85    |
| Ca                | 9,37 $\pm$ 0,38       | 9,6 $\pm$ 0,37        | 0,0007  |
| U Ca              | 184,31 $\pm$ 152,78   | 206,4 $\pm$ 127,03    | 0,03    |
| Ca <sup>++</sup>  | 4,49 $\pm$ 1,00       | 4,7 $\pm$ 0,14        | 0,26    |
| CL CR             | 103,79 $\pm$ 56,39    | 111,6 $\pm$ 51,68     | 0,46    |
| COL               | 188,00 $\pm$ 22,07    | 209,6 $\pm$ 33,00     | 0,51    |
| CREA              | 0,74 $\pm$ 0,15       | 0,7 $\pm$ 0,09        | 0,90    |
| CREA U            | 1.078,45 $\pm$ 539,81 | 1.163,9 $\pm$ 592,54  | 0,39    |
| GLIC              | 92,70 $\pm$ 13,29     | 83,38 $\pm$ 6,25      | 0,13    |
| HCO <sup>3-</sup> | 29,89 $\pm$ 2,55      | 31,4 $\pm$ 2,70       | 0,00    |
| HDL               | 56,00 $\pm$ 13,11     | 67,4 $\pm$ 14,25      | 0,02    |
| INSUL             | 6,54 $\pm$ 2,75       | 5,5 $\pm$ 2,68        | 0,95    |
| LDL               | 119,00 $\pm$ 9,54     | 139,7 $\pm$ 29,88     | 0,52    |
| Mg                | 1,99 $\pm$ 0,13       | 2,0 $\pm$ 0,16        | 0,12    |
| U Mg              | 78,67 $\pm$ 49,03     | 91,5 $\pm$ 45,81      | 0,18    |
| Na                | 140,62 $\pm$ 1,85     | 140,1 $\pm$ 2,22      | 0,10    |
| U Na              | 117,31 $\pm$ 64,34    | 150,0 $\pm$ 62,66     | 0,01    |
| OSTEO             | 18,06 $\pm$ 4,41      | 16,8 $\pm$ 5,28       | 0,02    |
| P                 | 3,50 $\pm$ 0,46       | 3,6 $\pm$ 0,37        | 0,23    |
| U P               | 667,33 $\pm$ 417,94   | 667,3 $\pm$ 417,94    | 1,00    |
| SPEC. W           | 1.017,14 $\pm$ 6,92   | 1.014,9 $\pm$ 5,64    | 0,04    |

|       |              |              |      |
|-------|--------------|--------------|------|
| pH    | 5,76 ±0,74   | 5,8 ± 0,62   | 1,00 |
| PTH   | 69,29 ±17,97 | 71,2 ±19,91  | 0,63 |
| VIT D | 29,48 ±12,84 | 33,8 ± 13,55 | 0,02 |

GLIC: glycemia (mg/ dL); CREA: creatinine (mg/dL); Na: sodium (mmol/L); Ca:calcium (mg/Dl); ALP: alkaline phosphatase (U/L); COL: cholesterol (mg/dL); HDL: Hight density lipoprotein (mg/ dL); LDL: Low density lipoprotein (mg/dL); P:phosphorus (mg/dL); Mg: magnesium (mg/dL); CREA U: urine creatinine (mg/24h); U Na: urinary sodium (mmol/24h); U Ca: urinary calcium (mmol/24h); U P: urinary phosphorus (mmol/24h); U Mg: urinary magnesium (mmol/24h); CL CR: creatinine clearance (ml/min); ALB: albumine (gr/dl); PTH: Parathormone (pg/ml); OSTEO: osteocalcine (mg/mL); 25-OHD: vitamine D (ng/ mL); INSUL: insulinemia (mcUI/ml); Ph; P.SPEC: specific weight; HCO<sup>3-</sup>: bicarbonate (mmol/L); Ca<sup>++</sup>: ionized calcium (mg/ dL).

**Supplementary Table S4** Control group's clinical average  $\pm$  standard deviation parameters at t0 and t6. *P-value* was calculated using *T-test*.

| Parameters        | CTRL-t0             | CTRL_t6             | p.value |
|-------------------|---------------------|---------------------|---------|
| ALB               | 4,23 $\pm$ 1,01     | 89.21 $\pm$ 11,03   | 0,90    |
| ALP               | 60,54 $\pm$ 16,22   | 0,70 $\pm$ 0,12     | 0,92    |
| Ca                | 9,41 $\pm$ 0,38     | 140,13 $\pm$ 1,75   | 1,00    |
| U Ca              | 140,24 $\pm$ 96,44  | 9,41 $\pm$ 1,36     | 0,74    |
| Ca <sup>++</sup>  | 4,58 $\pm$ 0,76     | 60,19 $\pm$ 15,29   | 0,32    |
| CL CR             | 91,86 $\pm$ 33,58   | 210,43 $\pm$ 34,63  | 0,40    |
| COL               | 225,00 $\pm$ 45,48  | 65,59 $\pm$ 14,59   | 0,44    |
| CREA              | 0,73 $\pm$ 0,14     | 140,18 $\pm$ 33,21  | 0,43    |
| CREA U            | 925,11 $\pm$ 306,83 | 3,7 $\pm$ 0,49      | 0,73    |
| GLIC              | 90,53 $\pm$ 9,40    | 2,02 $\pm$ 0,13     | 0,20    |
| HCO <sup>3-</sup> | 30,40 $\pm$ 2,80    | 949,32 $\pm$ 286,47 | 0,08    |
| HDL               | 63,00 $\pm$ 14,17   | 120,37 $\pm$ 46,25  | 0,74    |
| INSUL             | 6,63 $\pm$ 4,12     | 147,78 $\pm$ 99,30  | 0,83    |
| LDL               | 145,50 $\pm$ 47,37  | 525,37 $\pm$ 259,89 | 0,77    |
| Mg                | 2,02 $\pm$ 0,14     | 66,32 $\pm$ 27,82   | 1,00    |
| U Mg              | 68,11 $\pm$ 30,43   | 98,21 $\pm$ 31,11   | 0,79    |
| Na                | 139,97 $\pm$ 2,05   | 4,18 $\pm$ 0,24     | 0,72    |
| U Na              | 110,97 $\pm$ 41,61  | 55,21 $\pm$ 13,25   | 0,36    |
| OSTEO             | 17,73 $\pm$ 6,34    | 19,95 $\pm$ 8,63    | 0,21    |
| P                 | 3,61 $\pm$ 0,27     | 31,64 $\pm$ 13,017  | 0,36    |
| U P               | 525,38 $\pm$ 259,89 | 6,36 $\pm$ 3,31     | 1,00    |
| SPEC. W           | 1.015,89 $\pm$ 5,60 | 5,85 $\pm$ 0,67     | 0,35    |
| pH                | 5,84 $\pm$ 0,67     | 1014,70 $\pm$ 5,36  | 0,93    |
| PTH               | 60,76 $\pm$ 21,18   | 30,52 $\pm$ 3,83    | 0,18    |
| VIT D             | 27,84 $\pm$ 12,04   | 4,41 $\pm$ 0,70     | 0,20    |

GLIC: glycemia (mg/ dL); CREA: creatinine (mg/dL); Na: sodium (mmol/L); Ca:calcium (mg/Dl); ALP: alkaline phosphatase (U/L); COL: cholesterol (mg/dL); HDL: Hight density lipoprotein (mg/ dL); LDL: Low density lipoprotein (mg/dL); P:phosphorus (mg/dL); Mg: magnesium (mg/dL); CREA U: urine creatinine (mg/24h); U Na: urinary sodium (mmol/24h); U Ca: urinary calcium (mmol/24h); U P: urinary phosphorus (mmol/24h); U Mg: urinary magnesium (mmol/24h); CL CR: creatinine clearance (ml/min); ALB: albumine (gr/dl); PTH: Parathormone (pg/ml); OSTEO: osteocalcine (mg/mL); 25-OHD: vitamine D (ng/ mL); INSUL: insulinemia (mcUI/ml); Ph; P.SPEC: specific weight; HCO<sup>3-</sup>: bicarbonate (mmol/L); Ca<sup>++</sup>: ionized calcium (mg/ dL).

**Supplementary Table S5.** Intervention group and control group's clinical average  $\pm$  standard deviation parameters at t6. *P-value* was calculated using *T-test*.

| Parameters        | Intervention_group_t6 | CTRL_t6             | p-value  |
|-------------------|-----------------------|---------------------|----------|
| ALB               | 83,38 $\pm$ 6,25      | 89.21 $\pm$ 11,03   | 0,003    |
| ALP               | 0,7 $\pm$ 0,09        | 0,70 $\pm$ 0,12     | 0,11     |
| Ca                | 140,1 $\pm$ 2,22      | 140,13 $\pm$ 1,75   | 0,48     |
| U Ca              | 9,6 $\pm$ 0,37        | 9,41 $\pm$ 1,36     | 0,15     |
| Ca <sup>++</sup>  | 66,9 $\pm$ 19,16      | 60,19 $\pm$ 15,29   | 0,04     |
| CL CR             | 209,6 $\pm$ 33,00     | 210,43 $\pm$ 34,63  | 0,45     |
| COL               | 67,4 $\pm$ 14,25      | 65,59 $\pm$ 14,59   | 0,28     |
| CREA              | 139,7 $\pm$ 29,88     | 140,18 $\pm$ 33,21  | 0,47     |
| CREA U            | 3,6 $\pm$ 0,37        | 3,7 $\pm$ 0,49      | 0,11     |
| GLIC              | 2,0 $\pm$ 0,16        | 2,02 $\pm$ 0,13     | 0,49     |
| HCO <sup>3-</sup> | 1.163,9 $\pm$ 592,54  | 949,32 $\pm$ 286,47 | 0,02     |
| HDL               | 150,0 $\pm$ 62,66     | 120,37 $\pm$ 46,25  | 0,010    |
| INSUL             | 206,4 $\pm$ 127,03    | 147,78 $\pm$ 99,30  | 0,013    |
| LDL               | 667,3 $\pm$ 417,94    | 525,37 $\pm$ 259,89 | 0,03     |
| Mg                | 91,5 $\pm$ 45,81      | 66,32 $\pm$ 27,82   | 0,002    |
| U Mg              | 111,6 $\pm$ 51,68     | 98,21 $\pm$ 31,11   | 0,08     |
| Na                | 4,4 $\pm$ 0,1         | 4,18 $\pm$ 0,24     | 0,04     |
| U Na              | 71,2 $\pm$ 19,91      | 55,21 $\pm$ 13,25   | 4,44E-05 |
| OSTEO             | 16,8 $\pm$ 5,28       | 19,95 $\pm$ 8,63    | 0,02     |
| P                 | 33,8 $\pm$ 13,55      | 31,64 $\pm$ 13,017  | 0,28     |
| U P               | 5,5 $\pm$ 2,68        | 6,36 $\pm$ 3,31     | 0,09     |
| SPEC. W           | 5,8 $\pm$ 0,62        | 5,85 $\pm$ 0,67     | 0,24     |
| pH                | 1.014,9 $\pm$ 5,64    | 1014,70 $\pm$ 5,36  | 0,42     |
| PTH               | 31,4 $\pm$ 2,70       | 30,52 $\pm$ 3,83    | 0,11     |
| VIT D             | 4,7 $\pm$ 0,14        | 4,41 $\pm$ 0,70     | 0,011    |

GLIC: glycemia (mg/ dL); CREA: creatinine (mg/dL); Na: sodium (mmol/L); Ca:calcium (mg/dL); ALP: alkaline phosphatase (U/L); COL: cholesterol (mg/dL); HDL: Hight density lipoprotein (mg/ dL); LDL: Low density lipoprotein (mg/dL); P:phosphorus (mg/dL); Mg: magnesium (mg/dL); CREA U: urine creatinine (mg/24h); U Na: urinary sodium (mmol/24h); U Ca: urinary calcium (mmol/24h); U P: urinary phosphorus (mmol/24h); U Mg: urinary magnesium (mmol/24h); CL CR: creatinine clearance (ml/min); ALB: albumine (gr/dl); PTH: Parathormone (pg/ml); OSTEO: osteocalcine (mg/mL); 25-OHD: vitamine D (ng/ mL); INSUL: insulinemia (mcUI/ml); Ph; P.SPEC: specific weight; HCO<sup>3-</sup>: bicarbonate (mmol/L); Ca<sup>++</sup>: ionized calcium (mg/ dL).



**Supplementary Table S6.** Important serum and urine metabolites identified by Fold Change and logarithmic Fold Change ( $\log_2(\text{FC})$ ) parameters calculated.

| Serum                 | Fold Change | $\log_2(\text{FC})$ |
|-----------------------|-------------|---------------------|
| Hypoxanthine          | 12.267      | 36.167              |
| Ethanol               | 0.14964     | -27.405             |
| L-Arginine            | 0.17354     | -25.267             |
| L-Histidine           | 0.18232     | -24.555             |
| Pyruvic acid          | 0.2385      | -2.068              |
| 3-Hydroxybutyric acid | 0.28649     | -18.034             |
| Citric acid           | 0.28736     | -17.991             |
| Acetone               | 0.2923      | -17.745             |
| Isoleucine            | 0.30153     | -17.296             |
| Glycerol              | 0.33357     | -1.584              |
| Acetic acid           | 0.37096     | -14.307             |
| Methanol              | 0.42366     | -1.239              |
| Succinate             | 0.42765     | -12.255             |
| Betaine               | 22.077      | 11.426              |
| L-Asparagine          | 21.978      | 11.361              |
| Carnitine             | 20.423      | 10.302              |

| <b>Urine</b>    | <b>Fold Change</b> | <b>log2(FC)</b> |
|-----------------|--------------------|-----------------|
| Fructose        | 0.031436           | -49.914         |
| Trimethylamine  | 53.005             | 24.061          |
| L-Ornithine     | 42.797             | 20.975          |
| Ascorbic acid   | 41.349             | 20.478          |
| Myo-inositol    | 41.141             | 20.406          |
| L-Fucose        | 0.25179            | -19.897         |
| D-Galactose     | 37.351             | 19.012          |
| Glycine         | 32.604             | 1.705           |
| L-Leucine       | 0.30695            | -17.039         |
| Pyruvic acid    | 3.138              | 16.498          |
| Methionine      | 28.072             | 14.891          |
| Caffeine        | 27.285             | 14.481          |
| Gluconic acid   | 26.597             | 14.113          |
| L-Histidine     | 26.465             | 14.041          |
| Oxalacetic acid | 24.951             | 13.191          |
| Carnitine       | 23.441             | 12.291          |
| L-Glutamine     | 22.827             | 11.908          |
| Guanidoacetate  | 21.915             | 11.319          |
| Acetic acid     | 21.853             | 11.278          |

|                       |         |         |
|-----------------------|---------|---------|
| L-Arginine            | 0.47252 | -10.816 |
| Sarcosine             | 20.839  | 10.593  |
| Mannose               | 0.49226 | -10.225 |
| 3-Hydroxyisobutyrate  | 20.198  | 10.142  |
| 3-Hydroxybutyric acid | 20.189  | 10.136  |
| L-Cysteine            | 20.121  | 10.087  |
| L-Lactic acid         | 20.027  | 10.019  |

**Supplementary Table S7.** Important serum and urinary metabolites identified by t-tests values, p-values (Threshold <0.05), logarithmic p-values and False Discovery Rate (FDR) parameters calculated for the most statistically significant compounds.

| Serum                 | t.stat  | p.value  | FDR      |
|-----------------------|---------|----------|----------|
| 3-Hydroxybutyric acid | -14.12  | 1,09E-25 | 4,69E-24 |
| L-Arginine            | -88.468 | 1,84E-11 | 3,95E-10 |
| Succinate             | -77.884 | 8,86E-09 | 1,24E-07 |
| Citric acid           | -77.424 | 1,15E-08 | 1,24E-07 |
| Betaine               | 71.843  | 2,61E-07 | 2,24E-06 |
| Isoleucine            | -69.839 | 7,80E-08 | 5,59E-06 |
| D-Glucose             | 64.683  | 1,21E-05 | 7,45E-05 |
| Hypoxanthine          | 55.886  | 9,97E-04 | 5,36E-03 |
| L-Ornithine           | -51.454 | 7,92E-03 | 3,66E-02 |
| L-Lysine              | 51.298  | 8,50E-03 | 3,66E-02 |
| Valine                | 50.543  | 1,20E-02 | 4,68E-02 |
| Pyruvic acid          | -46.155 | 8,14E-02 | 2,92E-01 |
| Glycerol              | -44.267 | 1.79e-05 | 5,92E-01 |
| L-Leucine             | -44.072 | 1,94E-01 | 5,96E-01 |
| Carnitine             | 4.384   | 2,13E-01 | 6,11E-01 |
| L-Phenylalanine       | 43.667  | 2,29E-01 | 6,15E-01 |

|                       |         |            |            |
|-----------------------|---------|------------|------------|
| Urea                  | 37.502  | 0.00024855 | 0.00060451 |
| L-Histidine           | -37.453 | 0.00025305 | 0.00060451 |
| L-Threonine           | 34.831  | 0.00064327 | 0.0014558  |
| Tyrosine              | 33.805  | 0.00091445 | 0.0019661  |
| Glycine               | 31.814  | 0.0017686  | 0.0036214  |
| Choline               | 30.001  | 0.0031428  | 0.0061428  |
| Propylene glycol      | 2.935   | 0.0038398  | 0.0071787  |
| L-Alanine             | 27.362  | 0.0069368  | 0.012378   |
| L-Lactic acid         | 27.235  | 0.0071964  | 0.012378   |
| Acetoacetate          | 26.576  | 0.00869    | 0.014372   |
| 2-Hydroxybutyric acid | 2.607   | 0.010019   | 0.015956   |
| Ethanol               | -2.463  | 0.014863   | 0.022826   |
| L-Glutamic acid       | 23.557  | 0.019729   | 0.029254   |
| L-Asparagine          | 22.361  | 0.026764   | 0.038362   |
| <b>Urine</b>          | t.stat  | p.value    | FDR        |
| Fructose              | -99.992 | 2,96E-14   | 2.43e-16   |
| L-Arginine            | -90.193 | 9,92E-12   | 4,07E-10   |
| Glycine               | 85.983  | 1,15E-10   | 3,14E-09   |
| Trimethylamine        | 7.942   | 4,88E-09   | 1,00E-07   |
| Mannose               | -76.781 | 2,14E-08   | 3,24E-07   |

|                          |         |            |            |
|--------------------------|---------|------------|------------|
| Myo-inositol             | 76.593  | 2,37E-08   | 3,24E-07   |
| L-Leucine                | -6.787  | 2,67E-06   | 3,13E-05   |
| Alpha-Lactose            | -6.649  | 5,50E-06   | 5,64E-05   |
| L-Fucose                 | -65.882 | 7,55E-06   | 6,88E-05   |
| Pyruvic acid             | 61.693  | 6,40E-05   | 5,25E-04   |
| Hydroxyphenyllactic acid | -54.703 | 1,90E-03   | 1,42E-02   |
| Hypoxanthine             | 50.419  | 1,35E-02   | 9,20E-03   |
| L-Serine                 | -50.011 | 1,61E-02   | 1,02E-01   |
| 5-Aminopentanoate        | 44.165  | 1,94E-01   | 0.00011371 |
| Creatinine               | -4.324  | 2,82E-02   | 0.00015432 |
| 2-Oxopentanedioate       | -42.923 | 3,21E-01   | 0.00016429 |
| 2-Hydroxybutyric acid    | -41.726 | 5,15E-01   | 0.0002408  |
| Dimethylamine            | 41.659  | 5,29E-01   | 0.0002408  |
| Valine                   | -4.152  | 5,58E-01   | 0.00024084 |
| L-Cysteine               | 38.946  | 0.00014923 | 0.00061183 |
| Isoleucine               | -38.716 | 0.00016257 | 0.00063033 |
| L-Glutamine              | 38.504  | 0.00017594 | 0.00063033 |
| 2-Hydroxyisovalerate     | -3.849  | 0.0001768  | 0.00063033 |
| 3-Hydroxybutyric acid    | 3.685   | 0.00032158 | 0.0010987  |
| Caffeine                 | 36.636  | 0.00034723 | 0.0011389  |

|                      |         |            |           |
|----------------------|---------|------------|-----------|
| L-Cystine            | 36.199  | 0.00040567 | 0.0012794 |
| Creatine             | -35.276 | 0.00056088 | 0.0017034 |
| L-Proline            | 34.581  | 0.00071305 | 0.0020882 |
| L-Threonine          | 33.843  | 0.00091641 | 0.0025912 |
| Ascorbic acid        | 33.682  | 0.00096758 | 0.0026447 |
| L-Ornithine          | 32.845  | 0.0012788  | 0.0033827 |
| L-Phenylalanine      | 31.895  | 0.0017445  | 0.0044702 |
| Oxalacetic acid      | 30.331  | 0.0028658  | 0.007121  |
| 3-Hydroxyisobutyrate | -2.954  | 0.0036573  | 0.0088206 |
| L-Alanine            | 29.099  | 0.0041816  | 0.0097968 |
| Acetone              | -26.923 | 0.0079259  | 0.018053  |
| Isovaleric acid      | 25.347  | 0.012307   | 0.026584  |
| Phenylacetate        | 25.344  | 0.012319   | 0.026584  |
| Hippuric acid        | 24.402  | 0.015877   | 0.033382  |
| D-Galactose          | 23.602  | 0.019589   | 0.040157  |

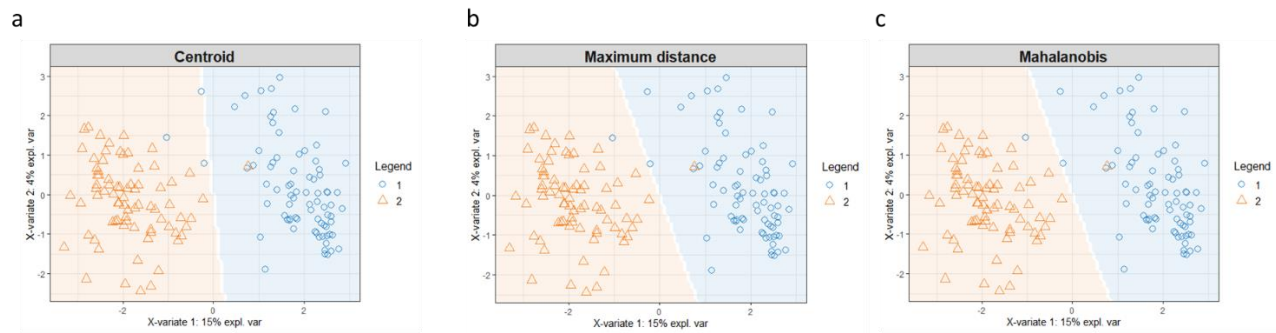

**Supplementary Figure S1.** Sample prediction area plot carried out using Centroid (a) Maximum distance (b) and Mahalanobis (c) showing the distribution of serum polar extract of intervention group at T0 (1) vs intervention group at T6 (2) in validation aerea

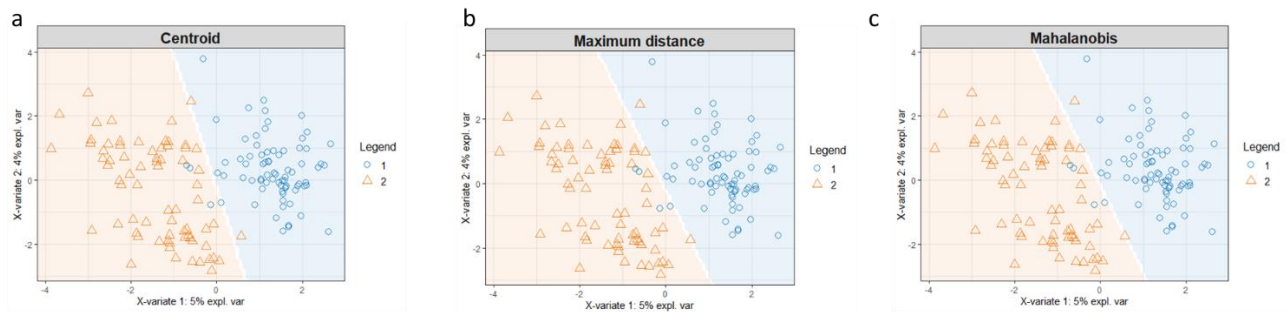

**Supplementary Figure S2.** Sample prediction area plot carried out using Centroid (a) Maximum distance (b) and Mahalanobis (c) showing the distribution of urine polar extract intervention group at T0 (1) vs intervention group at T6 (2) in validation aerea.

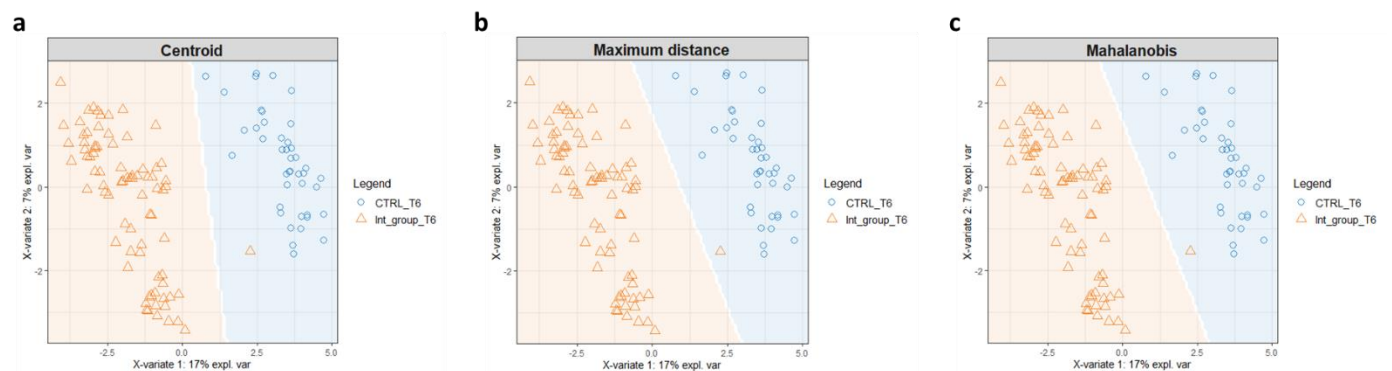



**Supplementary Figure S3.** Sample prediction area plot carried out using Centroid (a) Maximum distance (b) and Mahalanobis (c) showing the distribution of serum polar extract intervention group at T6 vs CTRL group at T6 in validation aerea.

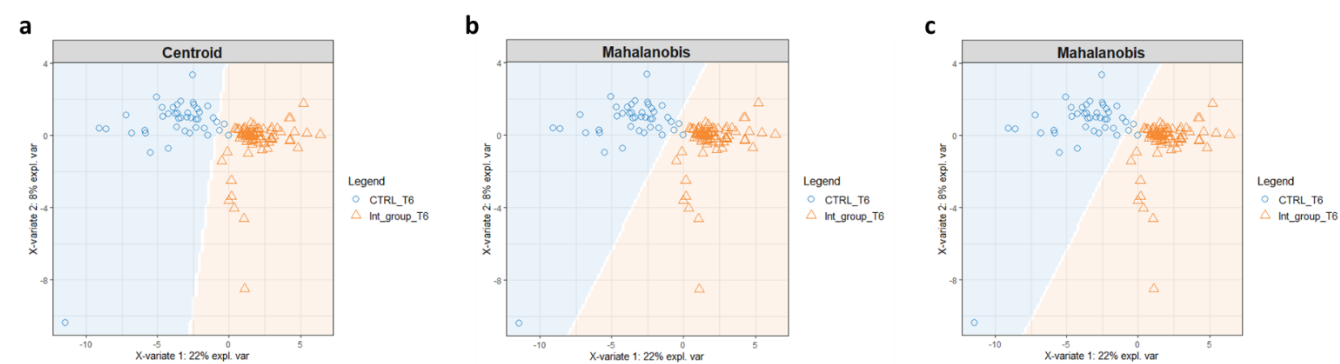

**Supplementary Figure S4.** Sample prediction area plot carried out using Centroid (a) Maximum distance (b) and Mahalanobis (c) showing the distribution of urine polar extract intervention group at T6 vs CTRL group at T6 in validation aerea.

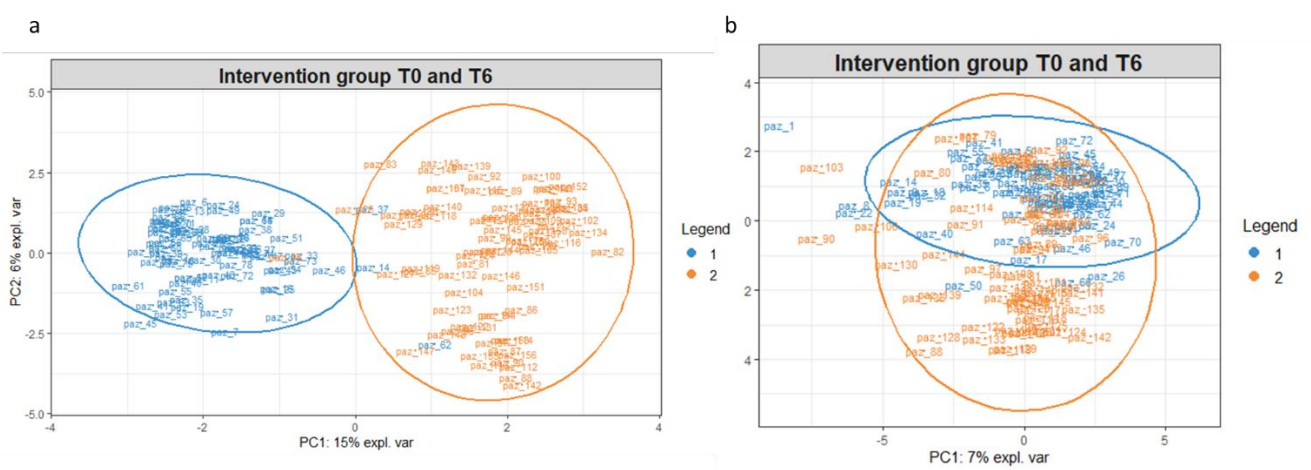

**Supplementary Figure S5.** PCA score plot for <sup>1</sup>H NMR data collected in 1D-NOESY spectra acquired at 600 MHz. Data represent the sera (a) and urine (b) from 79 women before (blue) and after (orange) bicarbonate-calcic water intake.
